# Supporting Information: Characterizing Engagement Dynamics across Topics on Facebook

Gabriele Etta<sup>1</sup>, Emanuele Sangiorgio<sup>2</sup>, Niccolò Di Marco<sup>3</sup>, Michele Avalle<sup>1</sup>, Antonio Scala<sup>4</sup>, Matteo Cinelli<sup>1</sup>, Walter Quattrociocchi<sup>1,\*</sup>

**1** Center of Data Science and Complexity for Society, Department of Computer Science, Sapienza Università di Roma

**2** Department of Social Sciences and Economics, Sapienza Università di Roma

**3** Department of Mathematics and Computer Science, University of Florence, Italy

**4** ISC-CNR UoS Sapienza, Rome, Italy

\* quattrociocchi@di.uniroma1.it

## List of topics employed

| Topic Keywords                                 | First Post Date | Last Post Date | Categories                               |
|------------------------------------------------|-----------------|----------------|------------------------------------------|
| Amyotrophic.lateral.sclerosis                  | 2018-01-02      | 2021-12-31     | Social, Health                           |
| DeleteUber                                     | 2018-01-01      | 2021-12-19     | Labor, Social                            |
| Roy.Moore.sexual.misconduct                    | 2018-01-02      | 2021-12-13     | Human.Rights, Politics, Social           |
| abilene.zoo                                    | 2018-01-08      | 2022-01-01     | Art.Culture.Sport, Environment           |
| abu.sayyaf                                     | 2018-01-02      | 2021-12-31     | Human.Rights, Politics, Religion         |
| action.news.jax                                | 2018-01-01      | 2021-12-31     | Art.Culture.Sport                        |
| afghan.refugees                                | 2018-01-01      | 2021-12-31     | Human.Rights                             |
| afghanistan.pakistani.militant                 | 2018-01-02      | 2021-12-31     | Human.Rights, Politics, Religion         |
| afghanistan.war                                | 2018-01-02      | 2022-01-01     | Human.Rights, Politics, Religion         |
| afp.paedophile.ring                            | 2018-08-15      | 2021-11-02     | Human.Rights                             |
| agent.skripal.spy                              | 2018-03-05      | 2021-12-29     | Politics                                 |
| aids.hiv                                       | 2018-01-02      | 2021-12-31     | Social, Health                           |
| al.aqsa.jerusalem.raid                         | 2018-01-15      | 2021-12-20     | Human.Rights, Politics, Religion, Social |
| alaska.pipeline                                | 2018-01-02      | 2021-12-31     | Economy, Environment                     |
| alex.jones                                     | 2018-01-02      | 2021-12-31     | Art.Culture.Sport, Politics, Social      |
| alshabab.mogadishu.somalia                     | 2018-01-24      | 2021-12-31     | Human.Rights, Politics, Religion         |
| aluminium.steel.tariffs                        | 2018-01-11      | 2021-12-31     | Economy, Labor, Politics                 |
| andhra.pradesh.uttarandhra                     | 2018-02-05      | 2021-12-03     | Economy, Politics, Social                |
| animal.conservation                            | 2018-01-01      | 2021-12-31     | Environment                              |
| animal.cruelty                                 | 2018-01-02      | 2021-12-31     | Environment, Health                      |
| animal.sanctuary.tiverton                      | 2018-03-19      | 2021-12-18     | Environment, Labor                       |
| antarctic.ice.melting                          | 2018-01-02      | 2021-12-31     | Environment, Social                      |
| antisemitic.jewish.orthodox                    | 2018-02-02      | 2021-12-26     | Human.Rights, Religion, Social           |
| apc.pdp.sheriff                                | 2018-01-03      | 2021-12-30     | Politics                                 |
| armenia.azerbaijan.border                      | 2018-01-09      | 2021-12-31     | Politics, Social                         |
| arvind.kejriwal                                | 2018-01-02      | 2020-12-31     | Human.Rights, Politics, Social           |
| ashland.fundraising                            | 2018-01-03      | 2021-12-31     | Art.Culture.Sport, Economy, Social       |
| asian.hate                                     | 2018-01-01      | 2021-12-31     | Human.Rights, Social                     |
| aung.san.suu.kyi                               | 2018-01-02      | 2021-12-31     | Human.Rights, Politics, Social           |
| australian.refugees                            | 2018-01-02      | 2022-01-01     | Human.Rights, Labor, Social              |
| baghdad.shiites                                | 2018-01-04      | 2021-11-29     | Religion, Social                         |
| ballistic.missile.test                         | 2018-01-01      | 2021-12-31     | Environment, Politics, Social, Tech.Sci  |
| band.debut.album                               | 2018-01-01      | 2021-12-31     | Art.Culture.Sport                        |
| benghazi.libya.militias                        | 2018-01-04      | 2021-12-21     | Human.Rights, Politics, Religion         |
| bilateral.cooperation                          | 2018-01-01      | 2021-12-31     | Economy, Politics                        |
| birds.invasive.population.species.conservation | 2018-01-05      | 2021-12-31     | Environment                              |
| black.racism                                   | 2018-01-01      | 2021-12-31     | Human.Rights, Social                     |
| blacklivesmatter                               | 2019-05-21      | 2021-12-31     | Human.Rights, Social                     |
| blue.whale.challenge                           | 2018-01-01      | 2021-12-31     | Social, Health                           |
| boat.sinks.die                                 | 2018-01-01      | 2021-12-25     | Human.Rights, Social                     |
| boeing.737.max.crash                           | 2018-01-01      | 2021-12-31     | Social                                   |
| boko.haram                                     | 2018-01-02      | 2022-01-01     | Human.Rights, Politics, Religion         |
| bollywood.celebrities                          | 2018-01-01      | 2021-12-31     | Art.Culture.Sport                        |
| bolsonaro.brazil                               | 2018-01-03      | 2021-12-31     | Human.Rights, Politics, Social           |
| bomber.commits.suicide                         | 2018-01-24      | 2021-12-14     | Social                                   |
| boris.hunt.tory.debate                         | 2018-01-31      | 2021-09-04     | Politics, Social                         |
| boris.johnson                                  | 2018-01-01      | 2021-12-31     | Politics                                 |
| bowe.bergdahl                                  | 2018-01-03      | 2021-12-26     | Human.Rights                             |
| brain.cells.tumour                             | 2018-01-03      | 2021-12-31     | Social, Tech.Sci, Health                 |
| breast.cancer                                  | 2018-01-01      | 2021-12-31     | Social, Health                           |
| britain.bridge.collapse                        | 2018-01-03      | 2021-12-23     | Art.Culture.Sport, Environment           |
| bsf.jammu.kashmir                              | 2018-01-02      | 2021-12-31     | Politics                                 |
| buckingham.palace                              | 2018-01-02      | 2021-12-31     | Art.Culture.Sport, Politics, Social      |
| burqa                                          | 2018-01-01      | 2021-12-31     | Human.Rights, Religion, Social           |
| bus.accident                                   | 2018-01-01      | 2021-12-31     | Labor, Social                            |

|                             |            |            |                                                                |
|-----------------------------|------------|------------|----------------------------------------------------------------|
| california_wildfire         | 2018-01-01 | 2021-12-31 | Environment                                                    |
| cameron_outcome_referendum  | 2018-01-02 | 2021-12-20 | Politics, Social                                               |
| capital_punishment          | 2018-01-01 | 2021-12-31 | Human_Rights, Social                                           |
| cathedral_notre_dame        | 2018-01-02 | 2021-12-31 | Art.Culture.Sport, Environment, Social                         |
| charlie_hebdo               | 2018-01-02 | 2021-12-31 | Art.Culture.Sport, Human_Rights, Politics, Religion, Social    |
| charlottesville_rally_unite | 2018-01-02 | 2021-12-31 | Human_Rights, Social                                           |
| chemtrails                  | 2018-01-01 | 2021-12-31 | Environment, Social, Tech.Sci                                  |
| climate_warming             | 2018-01-01 | 2021-12-31 | Environment, Social                                            |
| co2_emissions               | 2018-01-01 | 2021-12-31 | Environment, Politics, Tech_Sci                                |
| coach_k                     | 2018-01-01 | 2021-12-31 | Art.Culture.Sport                                              |
| colombia_farc               | 2018-01-01 | 2021-12-31 | Politics                                                       |
| colorado_shooting           | 2018-01-02 | 2021-12-31 | Social                                                         |
| confederate_statue_removed  | 2018-01-04 | 2021-12-31 | Art.Culture.Sport, Human_Rights, Social                        |
| contest_nobel_prize_winner  | 2018-01-17 | 2021-12-16 | Art.Culture.Sport, Tech.Sci                                    |
| correctional_prisons        | 2018-01-02 | 2021-12-31 | Human_Rights                                                   |
| crypto_currency_exchange    | 2018-01-02 | 2021-12-31 | Economy, Labor, Tech.Sci                                       |
| cuban_embargo               | 2018-01-02 | 2021-12-31 | Economy, Labor, Politics                                       |
| cultural_heritage           | 2018-01-02 | 2021-12-31 | Art.Culture.Sport, Environment, Human_Rights, Religion, Social |
| cyberbullying               | 2018-01-01 | 2021-12-31 | Social, Tech.Sci                                               |
| cybersecurity               | 2018-01-01 | 2021-12-31 | Politics, Social, Tech.Sci                                     |
| cybersquatting              | 2018-01-09 | 2021-12-23 | Economy, Labor, Social, Tech_Sci                               |
| dakota_pipeline             | 2018-01-01 | 2021-12-31 | Economy, Environment                                           |
| dakota_standing_rock        | 2018-01-01 | 2021-12-31 | Art.Culture.Sport, Environment, Human_Rights                   |
| delhi_pollution             | 2018-01-01 | 2021-12-31 | Environment, Social, Tech.Sci                                  |
| democracy_threat            | 2018-01-01 | 2021-12-31 | Politics, Social                                               |
| democrat_min_wage           | 2021-01-02 | 2021-12-31 | Economy, Human_Rights, Labor, Politics                         |
| dieselgate                  | 2018-01-01 | 2021-12-31 | Economy, Environment, Labor, Tech_Sci                          |
| diplomatic_immunity         | 2018-01-01 | 2021-12-31 | Politics                                                       |
| divorce_equality            | 2018-01-01 | 2021-12-31 | Economy, Politics, Social                                      |
| draft_nfl                   | 2018-01-02 | 2021-12-31 | Art.Culture.Sport                                              |
| duncan_dallas_ebola         | 2018-04-12 | 2021-08-01 | Social, Health                                                 |
| duterte_philippines         | 2018-01-02 | 2021-01-01 | Human_Rights, Politics, Social                                 |
| e_cigarettes                | 2018-01-02 | 2021-12-31 | Economy, Environment, Tech.Sci, Health                         |
| early_late_voter            | 2018-01-03 | 2021-12-31 | Politics, Social                                               |
| earthquake_nepal            | 2019-01-02 | 2022-01-01 | Environment                                                    |
| efcc_alleged_fraud          | 2018-01-03 | 2021-12-30 | Economy, Labor                                                 |
| el_chapo_guzman             | 2018-01-02 | 2021-12-31 | Economy, Social, Health,                                       |
| elon_musk_tesla             | 2018-01-02 | 2021-12-31 | Economy, Environment, Labor, Tech_Sci                          |
| endangered_species          | 2018-01-01 | 2021-12-31 | Environment, Tech.Sci, Health                                  |
| epa_effort                  | 2018-01-03 | 2021-12-30 | Environment, Social, Health                                    |
| erdogan_coup_d_etat_attempt | 2018-01-21 | 2021-12-06 | Politics, Social,                                              |
| erdogan_turkey              | 2018-01-01 | 2021-12-31 | Human_Rights, Politics                                         |
| eruption_volcanic_ash       | 2018-01-02 | 2021-12-31 | Environment                                                    |
| european_commission         | 2018-01-01 | 2021-12-31 | Economy, Labor, Politics, Social                               |
| fact_checking               | 2018-01-01 | 2021-12-31 | Social                                                         |
| factory_farming             | 2018-01-01 | 2021-12-31 | Economy, Environment, Labor                                    |
| fadnavis_maharashtra        | 2018-01-02 | 2021-12-31 | Environment, Politics, Social                                  |
| farmers_irrigation_scheme   | 2018-01-02 | 2021-12-31 | Economy, Environment, Labor, Tech_Sci                          |
| fashion_runway              | 2018-01-01 | 2021-12-31 | Art.Culture.Sport                                              |
| fiscal_cuts                 | 2018-01-01 | 2021-12-31 | Economy, Labor, Politics                                       |
| flat_earth                  | 2018-01-01 | 2021-12-31 | Environment, Social, Tech_Sci                                  |
| football_galbraith          | 2019-01-07 | 2021-12-27 | Art.Culture.Sport                                              |
| ford_kavanaugh              | 2018-02-13 | 2021-12-30 | Human_Rights, Social                                           |
| forest_wildfire             | 2018-01-02 | 2021-12-31 | Environment                                                    |
| garda_dublin                | 2018-01-03 | 2021-12-31 | Labor, Social                                                  |
| gay_marriages_ban           | 2018-01-05 | 2021-12-30 | Human_Rights, Politics, Social                                 |
| gdpr                        | 2018-01-02 | 2022-01-01 | Human_Rights, Politics, Social                                 |
| geert_wilders_netherlands   | 2018-01-03 | 2021-12-05 | Human_Rights, Politics, Religion                               |
| gender_bathroom             | 2018-01-01 | 2021-12-31 | Social                                                         |
| gender_gap                  | 2018-01-01 | 2021-12-31 | Economy, Human_Rights, Labor, Politics, Social                 |

|                                   |            |            |                                              |
|-----------------------------------|------------|------------|----------------------------------------------|
| gender_identity                   | 2018-01-02 | 2021-12-31 | Human_Rights, Social                         |
| george_bush                       | 2018-01-02 | 2021-12-31 | Politics                                     |
| germany_nazi_merkel               | 2018-01-02 | 2021-12-24 | Human_Rights, Politics, Religion, Social     |
| grace_mugabe                      | 2018-01-02 | 2021-12-30 | Economy, Environment, Human_Rights, Politics |
| greek_bailout_tsipras             | 2018-01-08 | 2021-07-16 | Economy, Labor, Politics, Social             |
| hackers_disinformation            | 2018-01-03 | 2021-12-28 | Social, Tech_Sci                             |
| haftar_lybia                      | 2018-01-02 | 2021-12-31 | Politics                                     |
| hajj_pilgrimage                   | 2018-01-02 | 2021-12-31 | Religion, Social                             |
| halifax_mass_shooting             | 2018-01-25 | 2021-12-06 | Social                                       |
| hamas                             | 2018-01-01 | 2021-12-31 | Human_Rights, Politics, Religion             |
| harvey_weinstein_sexual_abuse     | 2018-01-02 | 2021-12-31 | Art_Culture_Sport, Human_Rights              |
| hate_speech                       | 2018-01-01 | 2021-12-31 | Social                                       |
| hezbollah_lebanon                 | 2018-01-02 | 2021-12-31 | Human_Rights, Politics, Religion, Social     |
| hijab_ban                         | 2018-01-01 | 2021-12-31 | Human_Rights, Religion, Social               |
| holocaust                         | 2018-01-01 | 2021-12-31 | Human_Rights, Religion, Social               |
| homeless_shelter                  | 2018-01-01 | 2021-12-31 | Human_Rights, Social, Health                 |
| hong_kong_protest                 | 2018-01-02 | 2021-12-31 | Human_Rights, Politics, Social               |
| honolulu_civil_beat               | 2021-11-02 | 2021-12-31 | Art_Culture_Sport, Labor, Politics, Social   |
| houthi_yemen                      | 2018-01-02 | 2021-12-31 | Politics, Religion, Social                   |
| humanitarian_aid                  | 2018-01-01 | 2021-12-31 | Human_Rights                                 |
| hurricane_dorian                  | 2021-01-02 | 2021-12-31 | Environment                                  |
| hydrogen_vehicles                 | 2018-01-01 | 2021-12-31 | Economy, Environment, Labor, Tech_Sci        |
| illegal_immigration               | 2018-01-01 | 2021-12-31 | Human_Rights, Politics                       |
| imran_khan                        | 2018-01-02 | 2021-12-31 | Art_Culture_Sport, Politics, Social          |
| india_foreign_investment          | 2018-01-02 | 2021-12-31 | Economy, Labor, Politics                     |
| intensive_animal_farming          | 2018-01-04 | 2021-12-31 | Economy, Environment, Labor                  |
| iran_foreign_minister_zarif       | 2018-01-02 | 2021-12-13 | Politics                                     |
| iraqi_kurdish_mosul               | 2018-01-03 | 2021-12-27 | Politics, Religion, Social                   |
| ireland_sinn_fein                 | 2018-01-01 | 2021-12-31 | Politics                                     |
| jakarta_flood                     | 2018-01-03 | 2021-12-27 | Environment                                  |
| jamal_khashoggi                   | 2018-01-01 | 2021-12-31 | Art_Culture_Sport, Human_Rights, Politics    |
| jeffrey_epstein                   | 2018-01-01 | 2021-12-31 | Human_Rights                                 |
| jeremy_corbyn_labour              | 2018-01-02 | 2021-12-31 | Labor, Politics, Social                      |
| john_mccain                       | 2018-01-01 | 2021-12-31 | Politics                                     |
| joyce_marcel                      | 2018-01-04 | 2021-12-31 | Art_Culture_Sport                            |
| julian_assange_wikileaks          | 2018-01-02 | 2021-12-31 | Art_Culture_Sport, Economy, Politics, Social |
| kabila_congo                      | 2018-01-01 | 2021-12-31 | Politics                                     |
| karnataka_assembly_poll           | 2018-01-01 | 2021-12-30 | Politics                                     |
| kayapo                            | 2018-01-03 | 2021-12-31 | Environment, Human_Rights                    |
| kenney_elected_mayor_philadelphia | 2018-01-20 | 2021-12-31 | Politics, Social                             |
| kiev_donetsk_separatists          | 2018-01-13 | 2021-12-31 | Politics, Social                             |
| kiir_machar_south_sudan           | 2018-01-03 | 2021-12-31 | Politics                                     |
| kilauea_eruption                  | 2018-01-01 | 2021-12-31 | Environment, Tech_Sci                        |
| kim_jong_un                       | 2018-01-01 | 2021-12-31 | Human_Rights, Politics                       |
| klopp_liverpool                   | 2018-01-02 | 2021-12-31 | Art_Culture_Sport                            |
| labor_movement                    | 2018-01-02 | 2021-12-31 | Economy, Labor, Politics                     |
| lahore_rape                       | 2018-01-01 | 2021-12-26 | Human_Rights                                 |
| lee_kuala_lumpur                  | 2018-01-02 | 2021-12-31 | Social                                       |
| legalize_prostitution             | 2018-01-05 | 2021-12-30 | Social                                       |
| leo_varadkar_taoiseach            | 2018-01-02 | 2021-12-31 | Human_Rights, Politics, Social               |
| lgbt_discrimination               | 2018-01-02 | 2021-12-31 | Human_Rights, Social                         |
| london_mayor_re-election_bid      | 2018-02-01 | 2021-11-15 | Politics, Social                             |
| louisiana_parish_arrested         | 2018-01-02 | 2021-12-31 | Social                                       |
| lung_cancer                       | 2018-01-01 | 2021-12-31 | Social, Tech_Sci, Health                     |
| macron_france                     | 2018-01-01 | 2021-12-31 | Politics                                     |
| maduro_venezuela                  | 2018-01-02 | 2021-12-29 | Politics                                     |
| marco_rubio_debate                | 2021-01-03 | 2021-12-25 | Politics                                     |
| marijuana_legalization            | 2018-01-02 | 2022-01-01 | Economy, Politics, Social, Health            |
| marine_corps                      | 2018-01-01 | 2021-12-31 | Labor, Social                                |

|                                       |            |            |                                                |
|---------------------------------------|------------|------------|------------------------------------------------|
| marine_le_pen                         | 2018-01-02 | 2021-12-31 | Politics                                       |
| mars_mission                          | 2018-01-01 | 2021-12-31 | Environment, Tech_Sci                          |
| mars_spacecraft_mission               | 2018-01-02 | 2021-12-31 | Environment, Tech_Sci                          |
| martin_luther_king                    | 2018-01-02 | 2022-01-01 | Human_Rights, Politics, Social                 |
| maryam_nawaz                          | 2018-01-01 | 2021-12-31 | Politics                                       |
| mass_shootings                        | 2018-01-02 | 2022-01-01 | Social                                         |
| measles                               | 2018-01-01 | 2021-12-31 | Social, Tech_Sci, Health                       |
| meghan_harry                          | 2018-01-02 | 2022-01-01 | Politics, Social                               |
| merkel_germany                        | 2018-01-01 | 2021-12-31 | Politics                                       |
| metoo                                 | 2018-01-01 | 2021-12-31 | Human_Rights, Labor, Social                    |
| metric_tonnes_waste                   | 2018-01-02 | 2021-12-30 | Environment, Tech_Sci                          |
| mexican_migrants                      | 2018-01-01 | 2021-12-31 | Human_Rights, Politics, Social                 |
| mexico_wall                           | 2018-01-01 | 2021-12-31 | Human_Rights, Politics, Social                 |
| mh370                                 | 2019-01-02 | 2021-12-29 | Social                                         |
| michael_brown_shooting                | 2018-01-03 | 2021-12-31 | Human_Rights, Social                           |
| michael_cohen_lawyer                  | 2018-01-05 | 2021-12-31 | Politics                                       |
| migration_pact                        | 2018-01-05 | 2021-12-31 | Human_Rights, Politics, Social                 |
| mike_pence_indiana                    | 2018-01-02 | 2021-12-20 | Politics                                       |
| mindanao_martial_law                  | 2018-01-01 | 2021-12-31 | Human_Rights, Politics, Social, Health         |
| minimum_wage                          | 2018-01-02 | 2021-12-31 | Economy, Human_Rights, Labor, Politics, Social |
| mission_moon                          | 2018-01-01 | 2021-12-31 | Environment, Tech_Sci                          |
| modis_narendra                        | 2018-01-05 | 2021-12-29 | Politics                                       |
| morsi_sisi_egypt                      | 2018-01-09 | 2021-12-30 | Politics, Religion                             |
| mueller_probe                         | 2018-01-02 | 2021-12-30 | Politics                                       |
| muslim_brotherhood                    | 2018-01-01 | 2021-12-31 | Religion                                       |
| nafta_trade                           | 2018-01-01 | 2021-12-31 | Economy, Labor, Politics                       |
| native_american_indigenous            | 2018-01-01 | 2021-12-31 | Human_Rights                                   |
| natural_gas_prices                    | 2018-01-01 | 2021-12-31 | Economy, Environment, Labor, Politics          |
| nauru_refugees                        | 2018-01-02 | 2021-12-31 | Human_Rights                                   |
| nelson_bay_cup                        | 2018-01-13 | 2021-12-31 | Art_Culture_Sport                              |
| netanyahu                             | 2018-01-01 | 2021-12-31 | Politics                                       |
| nicola_sturgeon_scotland_independence | 2018-01-02 | 2021-12-31 | Politics, Social                               |
| nigel_farage_ukip                     | 2018-01-02 | 2021-12-28 | Politics, Social                               |
| nikolas_cruz                          | 2018-01-09 | 2021-12-31 | Social                                         |
| nitish_kumar_bihar                    | 2018-01-02 | 2021-12-31 | Politics                                       |
| npa_rebels                            | 2018-01-01 | 2021-12-31 | Politics                                       |
| nuclear_war                           | 2018-01-01 | 2021-12-31 | Environment, Politics, Social, Tech_Sci        |
| obrador_mexico                        | 2018-01-01 | 2021-12-31 | Politics                                       |
| ocean_fishing                         | 2018-01-02 | 2021-12-31 | Economy, Environment, Labor                    |
| off_peak_season_travel                | 2018-01-01 | 2021-12-31 | Art_Culture_Sport, Economy, Environment        |
| offshore_wind                         | 2018-01-01 | 2021-12-31 | Economy, Environment, Tech_Sci                 |
| operation_varsity_blues               | 2018-06-16 | 2021-12-31 | Art_Culture_Sport, Labor, Social               |
| opioid_drug_crisis                    | 2018-01-01 | 2021-12-31 | Social, Health                                 |
| organ_trade                           | 2018-01-01 | 2021-12-31 | Economy, Human_Rights, Health                  |
| pacific_solution                      | 2018-01-01 | 2021-12-31 | Human_Rights, Politics                         |
| panama_papers                         | 2018-01-02 | 2021-12-31 | Economy                                        |
| paul_manafort                         | 2018-08-02 | 2021-12-30 | Politics                                       |
| pension_retirement_age                | 2018-01-01 | 2021-12-31 | Economy, Labor, Politics, Social, Health       |
| pkk                                   | 2018-01-02 | 2021-12-31 | Human_Rights, Politics, Social                 |
| planned_pregnancy                     | 2018-01-02 | 2022-01-01 | Human_Rights, Social, Tech_Sci, Health         |
| plastic_surgery                       | 2018-01-02 | 2021-12-31 | Social, Tech_Sci, Health                       |
| ponte_morandi                         | 2018-01-03 | 2021-12-31 | Social                                         |
| portland_standoff                     | 2018-01-03 | 2021-12-12 | Human_Rights, Social                           |
| protest_sign_mou                      | 2018-01-09 | 2021-12-22 | Social                                         |
| rajapaksa_sri_lanka                   | 2018-01-02 | 2021-12-31 | Politics                                       |
| rajasthan_mps                         | 2018-01-07 | 2021-12-31 | Politics                                       |
| rajya_sabha_elections_bjp             | 2018-01-02 | 2021-12-30 | Politics, Social                               |
| rakhine_rohingya_myanmar              | 2018-01-01 | 2021-12-31 | Human_Rights, Religion, Social                 |
| ramaphosa_south_africa                | 2018-01-01 | 2021-12-31 | Human_Rights, Labor, Politics, Social          |
| randolph_holhut                       | 2018-02-21 | 2021-09-30 | Art_Culture_Sport                              |

|                               |            |            |                                                 |
|-------------------------------|------------|------------|-------------------------------------------------|
| ransomware                    | 2018-01-01 | 2021-12-31 | Economy, Tech_Sci                               |
| rauner_illinois               | 2018-01-01 | 2021-12-22 | Politics                                        |
| recreational_cannabis         | 2018-01-01 | 2021-12-31 | Politics, Social, Health                        |
| religion_freedom              | 2018-01-01 | 2021-12-31 | Human_Rights, Religion                          |
| reynolds_mourned              | 2018-07-04 | 2021-12-31 | Labor, Social                                   |
| rock_n_roll_savannah_marathon | 2018-01-04 | 2021-12-14 | Art_Culture.Sport, Social                       |
| roe_v_wade_case               | 2018-01-02 | 2021-12-31 | Human_Rights, Social                            |
| ryanair_pilot_strike          | 2018-01-04 | 2019-10-03 | Labor                                           |
| salman_saudi_arabia           | 2018-01-01 | 2021-12-31 | Human_Rights, Politics, Religion,               |
| santos_colombia               | 2018-01-02 | 2021-12-31 | Politics                                        |
| sargsyan_armenia              | 2018-01-02 | 2021-12-31 | Politics                                        |
| scientist_hansen_nasa         | 2018-01-06 | 2021-12-29 | Art_Culture.Sport, Environment, Labor, Tech_Sci |
| scott_morrison_kabul          | 2018-02-18 | 2021-12-30 | Human_Rights, Politics                          |
| scott_walker_wisconsin        | 2018-01-02 | 2021-12-31 | Politics                                        |
| self-driving_car              | 2018-01-01 | 2021-12-31 | Economy, Labor, Social, Tech_Sci                |
| shiv_sena_maharashtra         | 2018-01-02 | 2021-12-31 | Human_Rights, Politics                          |
| sirisena_sri_lanka            | 2018-01-01 | 2021-12-30 | Politics                                        |
| smart_cities                  | 2018-01-01 | 2021-12-31 | Economy, Environment, Social, Tech_Sci          |
| smith_scandal_resigns         | 2018-03-25 | 2021-11-26 | Art_Culture.Sport                               |
| snowden                       | 2018-01-02 | 2021-12-31 | Human_Rights, Politics, Social, Tech_Sci        |
| society_civil_servants        | 2018-01-01 | 2021-12-31 | Labor, Politics                                 |
| solar_panels                  | 2018-01-01 | 2021-12-31 | Economy, Environment, Tech_Sci                  |
| sonia_rahul_gandhi            | 2018-01-02 | 2021-12-31 | Politics                                        |
| spacex_moon_mission           | 2018-01-01 | 2021-12-30 | Environment, Labor, Tech_Sci                    |
| spending_cuts                 | 2018-01-01 | 2021-12-31 | Economy, Labor, Politics, Social                |
| stolen_identity               | 2018-01-01 | 2021-12-31 | Social                                          |
| syria_kurdish_war             | 2018-01-02 | 2021-12-30 | Human_Rights, Politics, Social                  |
| syrian_refugees               | 2018-01-01 | 2021-12-31 | Human_Rights                                    |
| tamil_ltte                    | 2018-01-04 | 2021-12-31 | Human_Rights, Politics, Social                  |
| telangana_rao_trs             | 2018-01-02 | 2021-12-31 | Politics                                        |
| theresa_may_brexit            | 2018-01-02 | 2021-12-30 | Politics, Social                                |
| tiger_woods_win               | 2018-01-02 | 2021-12-31 | Art_Culture.Sport                               |
| tony_abbott_malcolm_turnbull  | 2018-01-02 | 2022-01-01 | Politics                                        |
| tourism_boost                 | 2018-01-01 | 2021-12-31 | Economy, Environment, Labor                     |
| tourists_overrun              | 2018-01-03 | 2021-12-31 | Environment, Social                             |
| tpp                           | 2018-01-02 | 2021-12-31 | Economy, Politics                               |
| truck_highway_crashes         | 2018-01-02 | 2021-12-31 | Labor                                           |
| trudeau_canada                | 2018-01-02 | 2021-12-31 | Politics                                        |
| trump_impeachment             | 2018-01-01 | 2021-12-31 | Politics                                        |
| tsai_ing_wen_taiwan           | 2018-01-01 | 2021-12-31 | Human_Rights, Politics, Social                  |
| tshisekedi_congo              | 2018-01-01 | 2021-12-31 | Politics                                        |
| tupac                         | 2018-01-26 | 2021-12-09 | Art_Culture.Sport                               |
| uber_ride_sharing             | 2018-01-02 | 2021-12-31 | Economy, Labor                                  |
| uhuru_kenyatta                | 2018-01-01 | 2021-12-31 | Politics                                        |
| undercover_comey_fbi          | 2018-02-07 | 2021-11-08 | Politics                                        |
| undp_procurement              | 2018-01-04 | 2021-12-31 | Economy, Human_Rights, Labor, Politics, Social  |
| unhcr_refugees                | 2018-01-01 | 2021-12-31 | Human_Rights                                    |
| vatican_abuse                 | 2018-01-03 | 2022-01-01 | Human_Rights, Religion                          |
| white_supremacist             | 2018-01-01 | 2021-12-31 | Human_Rights, Social                            |
| william_barr_attorney_general | 2018-04-30 | 2021-12-31 | Politics                                        |
| william_kate_middleton        | 2018-01-02 | 2021-12-31 | Politics, Social                                |
| williams_plead_guilty         | 2018-01-03 | 2021-12-25 | Social                                          |
| wirecard_scandal              | 2019-01-02 | 2022-05-05 | Economy, Labor                                  |
| women_abortion                | 2018-01-02 | 2022-01-01 | Human_Rights, Social, Health                    |
| xi_jinping                    | 2018-01-01 | 2021-12-31 | Politics                                        |
| xinhua_silk_road              | 2018-01-19 | 2021-12-30 | Economy, Labor                                  |
| yakubu_dogara_sacked          | 2018-01-15 | 2021-12-05 | Politics                                        |
| yanukovych_crimea             | 2018-01-03 | 2021-12-30 | Politics                                        |
| ywca                          | 2018-01-02 | 2021-12-31 | Human_Rights, Religion, Social                  |
| zayed_uae                     | 2018-01-01 | 2021-12-31 | Economy, Politics, Social                       |
| zika_virus                    | 2018-01-02 | 2021-12-31 | Social, Health                                  |
| zuma_south_africa             | 2018-01-01 | 2021-12-31 | Human_Rights, Politics, Social                  |

**Table 1.** List of terms employed to perform the research for each topic together with the first and last date when a post related to each topic was found.

## Data breakdown at topic level

### Evaluating the relationship between topic engagement evolution and controversy

**Fig S1.** Correlation between  $\alpha$  and  $LH$  score for each identified topic.

### Goodness of the fitting procedure

We fit the cumulative evolution of engagement for the topics in the List of topics employed Section with the function  $f_{\alpha,\beta}$ . The fitting procedure produces, for each topic  $i$ , the tuples  $(\hat{\alpha}_i, \hat{\beta}_i)$  and  $(SE(\hat{\alpha}_i), SE(\hat{\beta}_i))$  containing the estimated parameters with their standard errors, respectively. Fig. S2 provides a joint distribution of the errors  $(SE(\hat{\alpha}_i), SE(\hat{\beta}_i))$  for each topic in relationship with the number of posts they produced. We observe how  $SE(\hat{\alpha}_i)$  errors follow a log-normal distribution, while  $SE(\hat{\beta}_i)$  errors have a normal one. We can observe a reduction in the errors for both parameters as the number of posts per topic increases. We formerly assess such relationship by computing a Spearman correlation coefficient between each standard error and the number of posts per topic, obtaining a value of  $\rho(SE(\hat{\alpha}_i), posts_i) = -0.44$  and  $\rho(SE(\hat{\beta}_i), posts_i) = -0.25$ . We can therefore conclude that our fitting procedure provides results with a reducing error as the number of observations increases.

**Fig S2.** Joint distribution of the errors  $SE(\hat{\alpha}_i)$  and  $SE(\hat{\beta}_i)$  for each topic  $i$ , whose cumulative curve was estimated by means of  $f_{\alpha,\beta}$ . The colour of each point represent the number of posts produced by topic  $i$ .

### Assessing the differences of engagement behaviors across topic categories

| Category          | $\alpha$        | $\beta$         | SI          |
|-------------------|-----------------|-----------------|-------------|
| Art_Culture_Sport | 0.043 (0.1647)  | 693.8 (236)     | 0.49 (0.13) |
| Economy           | 0.0045 (0.0022) | 752.36 (241.45) | 0.48 (0.14) |
| Environment       | 0.0215 (0.1214) | 761.41 (207.81) | 0.47 (0.11) |
| Human_Rights      | 0.0244 (0.113)  | 765.48 (223.24) | 0.47 (0.14) |
| Labor             | 0.0137 (0.0618) | 715.41 (286.41) | 0.49 (0.15) |
| Politics          | 0.0192 (0.0953) | 711.78 (243.12) | 0.5 (0.15)  |
| Religion          | 0.0405 (0.1906) | 786.5 (184.07)  | 0.46 (0.12) |
| Social            | 0.024 (0.1182)  | 728.58 (204.3)  | 0.49 (0.12) |
| Tech_Sci          | 0.004 (0.0013)  | 801.76 (187.67) | 0.46 (0.11) |
| Health            | 0.0045 (0.0016) | 692.03 (128.7)  | 0.52 (0.08) |

**Table 2.** Summary of  $\alpha$ ,  $\beta$  and Speed Index mean values (and SD) per topic category.

| Category          | Rho   | p.value |
|-------------------|-------|---------|
| All               | -0.26 | 0       |
| Art_Culture_Sport | -0.2  | 0.2631  |
| Economy           | -0.2  | 0.1665  |
| Environment       | -0.21 | 0.1379  |
| Human_Rights      | -0.29 | 0.0067  |
| Labor             | -0.35 | 0.0162  |
| Politics          | -0.36 | 0       |
| Religion          | -0.12 | 0.5308  |
| Social            | -0.23 | 0.0057  |
| Tech_Sci          | -0.21 | 0.2256  |
| Health            | -0.45 | 0.0267  |

**Table 3.** Spearman’s Rho between Speed and Love-Hate Score per category (CI = 0.95). For readability, 0 represents values lower than 0.0001.

|          | A_C_S  | Econ   | Env    | H_R           | Labor  | Politics | Religion | Social | Tech          | Health |
|----------|--------|--------|--------|---------------|--------|----------|----------|--------|---------------|--------|
| A_C_S    |        | 0.3621 | 0.9226 | 0.3671        | 0.7594 | 0.5024   | 0.8931   | 0.8646 | 0.1195        | 0.9688 |
| Econ     | 0.3621 |        | 0.2994 | 0.0104        | 0.4292 | 0.0146   | 0.3788   | 0.0793 | 0.3247        | 0.3496 |
| Env      | 0.9226 | 0.2994 |        | 0.1287        | 0.9135 | 0.2025   | 0.992    | 0.5873 | 0.0546        | 0.9688 |
| H_R      | 0.3671 | 0.0104 | 0.1287 |               | 0.134  | 0.6761   | 0.2437   | 0.2236 | <b>0.0009</b> | 0.2014 |
| Labor    | 0.7594 | 0.4292 | 0.9135 | 0.134         |        | 0.1818   | 0.8575   | 0.4937 | 0.0874        | 0.9322 |
| Politics | 0.5024 | 0.0146 | 0.2025 | 0.6761        | 0.1818 |          | 0.335    | 0.3465 | 0.0018        | 0.2755 |
| Religion | 0.8931 | 0.3788 | 0.992  | 0.2437        | 0.8575 | 0.335    |          | 0.6836 | 0.0976        | 0.9347 |
| Social   | 0.8646 | 0.0793 | 0.5873 | 0.2236        | 0.4937 | 0.3465   | 0.6836   |        | 0.011         | 0.6151 |
| Tech     | 0.1195 | 0.3247 | 0.0546 | <b>0.0009</b> | 0.0874 | 0.0018   | 0.0976   | 0.011  |               | 0.08   |
| Health   | 0.9688 | 0.3496 | 0.9688 | 0.2014        | 0.9322 | 0.2755   | 0.9347   | 0.6151 | 0.08          |        |

**Table 4.** p-values of the two-tailed Mann–Whitney U tests performed on the average  $\alpha$  parameter value between categories (CI = 0.95). Bold values represent the value for which the null hypothesis was rejected.

|          | A_C_S  | Econ   | Env    | H_R    | Labor  | Politics | Religion | Social | Tech   | Health |
|----------|--------|--------|--------|--------|--------|----------|----------|--------|--------|--------|
| A_C_S    |        | 0.1688 | 0.171  | 0.2124 | 0.5789 | 0.7218   | 0.2055   | 0.5985 | 0.0532 | 0.8082 |
| Econ     | 0.1688 |        | 0.952  | 0.7537 | 0.6159 | 0.1358   | 0.9875   | 0.181  | 0.5199 | 0.0567 |
| Env      | 0.171  | 0.952  |        | 0.718  | 0.6412 | 0.0932   | 0.9759   | 0.1386 | 0.4838 | 0.0315 |
| H_R      | 0.2124 | 0.7537 | 0.718  |        | 0.6522 | 0.1274   | 0.7229   | 0.1808 | 0.2939 | 0.0599 |
| Labor    | 0.5789 | 0.6159 | 0.6412 | 0.6522 |        | 0.5506   | 0.5529   | 0.7086 | 0.2948 | 0.2793 |
| Politics | 0.7218 | 0.1358 | 0.0932 | 0.1274 | 0.5506 |          | 0.1676   | 0.7814 | 0.0274 | 0.3969 |
| Religion | 0.2055 | 0.9875 | 0.9759 | 0.7229 | 0.5529 | 0.1676   |          | 0.1816 | 0.5318 | 0.0418 |
| Social   | 0.5985 | 0.181  | 0.1386 | 0.1808 | 0.7086 | 0.7814   | 0.1816   |        | 0.0338 | 0.2407 |
| Tech     | 0.0532 | 0.5199 | 0.4838 | 0.2939 | 0.2948 | 0.0274   | 0.5318   | 0.0338 |        | 0.0076 |
| Health   | 0.8082 | 0.0567 | 0.0315 | 0.0599 | 0.2793 | 0.3969   | 0.0418   | 0.2407 | 0.0076 |        |

**Table 5.** p-values of the two-tailed Mann–Whitney U tests performed on the average  $\beta$  parameter value between categories (CI = 0.95). Bold values represent the value for which the null hypothesis was rejected.

|          | A_C_S  | Econ   | Env    | H_R    | Labor  | Politics | Religion | Social | Tech   | Health |
|----------|--------|--------|--------|--------|--------|----------|----------|--------|--------|--------|
| A_C_S    |        | 0.4121 | 0.3312 | 0.3731 | 0.5789 | 0.869    | 0.4838   | 0.8942 | 0.1862 | 0.4756 |
| Econ     | 0.4121 |        | 0.9253 | 0.9877 | 0.9856 | 0.2284   | 0.9212   | 0.3115 | 0.5664 | 0.0496 |
| Env      | 0.3312 | 0.9253 |        | 0.8325 | 0.908  | 0.1166   | 0.9037   | 0.1748 | 0.6437 | 0.0223 |
| H_R      | 0.3731 | 0.9877 | 0.8325 |        | 0.9216 | 0.1215   | 0.9618   | 0.2021 | 0.5007 | 0.0447 |
| Labor    | 0.5789 | 0.9856 | 0.908  | 0.9216 |        | 0.3042   | 0.8918   | 0.4106 | 0.5814 | 0.0888 |
| Politics | 0.869  | 0.2284 | 0.1166 | 0.1215 | 0.3042 |          | 0.2611   | 0.7012 | 0.0617 | 0.3407 |
| Religion | 0.4838 | 0.9212 | 0.9037 | 0.9618 | 0.8918 | 0.2611   |          | 0.3424 | 0.6332 | 0.0733 |
| Social   | 0.8942 | 0.3115 | 0.1748 | 0.2021 | 0.4106 | 0.7012   | 0.3424   |        | 0.0784 | 0.1822 |
| Tech     | 0.1862 | 0.5664 | 0.6437 | 0.5007 | 0.5814 | 0.0617   | 0.6332   | 0.0784 |        | 0.0103 |
| Health   | 0.4756 | 0.0496 | 0.0223 | 0.0447 | 0.0888 | 0.3407   | 0.0733   | 0.1822 | 0.0103 |        |

**Table 6.** p-values of the two-tailed Mann–Whitney U tests performed on the average Speed Index between categories (CI = 0.95). Bold values represent the value for which the null hypothesis was rejected.

|          | A_C_S         | Econ   | Env           | H_R           | Labor  | Politics      | Religion | Social        | Tech          | Health |
|----------|---------------|--------|---------------|---------------|--------|---------------|----------|---------------|---------------|--------|
| A_C_S    |               | 0.0369 | 0.2472        | <b>0.0001</b> | 0.009  | <b>0.0001</b> | 0.0048   | <b>0.0005</b> | 0.3624        | 0.0656 |
| Econ     | 0.0369        |        | 0.1372        | 0.0023        | 0.4167 | 0.0089        | 0.0792   | 0.0501        | 0.0777        | 0.9081 |
| Env      | 0.2472        | 0.1372 |               | <b>0</b>      | 0.0238 | <b>0</b>      | 0.004    | <b>0.0003</b> | 0.7374        | 0.1817 |
| H_R      | <b>0.0001</b> | 0.0023 | <b>0</b>      |               | 0.0401 | 0.4758        | 0.5167   | 0.1535        | <b>0</b>      | 0.0275 |
| Labor    | 0.009         | 0.4167 | 0.0238        | 0.0401        |        | 0.107         | 0.3184   | 0.3601        | 0.0121        | 0.5761 |
| Politics | <b>0.0001</b> | 0.0089 | <b>0</b>      | 0.4758        | 0.107  |               | 0.9014   | 0.4024        | <b>0</b>      | 0.0708 |
| Religion | 0.0048        | 0.0792 | 0.004         | 0.5167        | 0.3184 | 0.9014        |          | 0.7623        | 0.0013        | 0.1672 |
| Social   | <b>0.0005</b> | 0.0501 | <b>0.0003</b> | 0.1535        | 0.3601 | 0.4024        | 0.7623   |               | <b>0.0002</b> | 0.1763 |
| Tech     | 0.3624        | 0.0777 | 0.7374        | <b>0</b>      | 0.0121 | <b>0</b>      | 0.0013   | <b>0.0002</b> |               | 0.1064 |
| Health   | 0.0656        | 0.9081 | 0.1817        | 0.0275        | 0.5761 | 0.0708        | 0.1672   | 0.1763        | 0.1064        |        |

**Table 7.** p-values of the two-tailed Mann–Whitney U tests performed on the average Love-Hate Score between categories (CI = 0.95). Bold values represent the value for which the null hypothesis was rejected.

|          | A_C_S  | Env    | Tech   | Politics      | Social        | H_R      |
|----------|--------|--------|--------|---------------|---------------|----------|
| A_C_S    |        |        |        | <b>0.0001</b> | <b>0.0003</b> | <b>0</b> |
| Env      |        |        |        | <b>0</b>      | <b>0.0002</b> | <b>0</b> |
| Tech     |        |        |        | <b>0</b>      | <b>0.0001</b> | <b>0</b> |
| Politics | 0.9999 | 1      | 1      |               |               |          |
| Social   | 0.9998 | 0.9998 | 0.9999 |               |               |          |
| H_R      | 1      | 1      | 1      |               |               |          |

**Table 8.** p-values of Mann–Whitney U test on LH mean value between categories for which the null hypothesis was rejected in Table 7 (H1:  $\mu_r > \mu_c$ , where r and c represent row and column category; Conf. Level = 0.95). Bold values represent the value for which the null hypothesis was rejected.
